# Supplementary material for: Effects of different emission inventories on tropospheric ozone and methane lifetime
Source: Copernicus journal article supplement (doi:10.5194/egusphere-2025-294), 2025-02-24
Supplement: Supplementary file [file egusphere-2025-294-AC3-supplement.pdf]

# Reply to reviewer #3

Catherine Acquah<sup>1</sup>, Laura Stecher<sup>1,a</sup>, Mariano Mertens<sup>1,2</sup>, and Patrick Jöckel<sup>1</sup>

<sup>1</sup>Deutsches Zentrum für Luft- und Raumfahrt, Institut für Physik der Atmosphäre, Oberpfaffenhofen, Germany

<sup>2</sup>Faculty of Aerospace Engineering, Section Operations and Environment, Delft University of Technology, 2629 HS, Delft, The Netherlands

<sup>a</sup>now at: Yusuf Hamied Department of Chemistry, University of Cambridge, Cambridge, CB2 1EW, United Kingdom

We thank reviewer #3 for her/his comments and the evaluation of our paper. Below, we repeat each comment (in blue) and address it (in black). Changes of the manuscript are written in italics.

5 This is a very nice paper that examines the response of some key climate variables to model input data from two versions of emissions from the Chemistry-Climate Model Intercomparison CCMI project. The authors use a well-established chemistry-climate model together with some innovative process-level outputs to investigate the response of tropospheric ozone, hydroxyl radical and methane lifetime to changes in emissions between two eras of CCMI. This work is significant for understanding both the sensitivity of models to evaluated emissions data and to begin to describe the source of intermodel diversity by defining model sensitivities. The study is well-designed and this paper fits well within the remit of ACP.

10 Thank you very much for this positive feedback!

15 After a short introduction, Section 1, Section 2 describes the study's Methods and Data. Section 2.1 describes the model in very short detail, and could be combined with section 2.2.1 which currently describes the components and other options chosen, as well as some of the emissions and with Section 2.2.2 which describes other emissions. Overall, I think the MS would be better if all the chemical species - methane, N<sub>2</sub>O, NO<sub>x</sub> and CO, BVOC etc- were discussed together in one section, and if L114-119 and L124-126 were moved up the MS. Similarly I think all of the text from L1-L20 of the Supplementary should be moved either to this section, or the Discussion.

20 We modified the structure of the methods section. It now starts with a general short description of MESSy, followed by set-up specifics (i.e. nudging, QCTM mode, and natural emissions), and ends with a description of the different simulations that were performed for this paper. We still prefer to introduce the prescribed inventories of ozone precursor species in a separate section as they are described quite extensively.

Concerning the suggestion to move L1-L20 of the Supplement to the main manuscript, we are hesitating as in the supplement changes in the simulations originally performed for the two phases of CCMI are discussed. These differences do not affect the simulations analysed in the manuscript, EMIS-01 and EMIS-02, which have been run with the same model version.

25 We modified the supplement to stress this point.

Section 2.2.3 describes the tagging methodology, and 2.3 the calculation of methane lifetime. In this section, and in the MS overall, I think the word category becomes rather laborious. Where the categories are emissions from a specific sector, it would be helpful, and the MS would be improved, if the word 'sector' was retained in favour of 'category', and the other non-emission tagging labels were called e.g. 'N2O decomposition processes' or something similar. (The authors in fact seem to prefer the word sector in their Conclusions section).

We are hesitating to avoid the term category completely, as it is the term used by the publications on the implementation of the TAGGING submodel to describe all the different sources regardless of the type of source (emission sector, decomposition process) (Grewe et al., 2017; Rieger et al., 2018). Therefore, we think "category" is the right term to use when describing technical details of the TAGGING submodel or the methods to attribute the methane lifetime change. The description of the methodology should be independent of the type of source, e.g. emission, decomposition process, production in the stratosphere. Later on in the results section, we want to attribute O3, OH and CH4 lifetime changes to individual emission sectors as the prescribed emissions are different in both simulations. We added a short introduction/definition of both terms, (tagging) category and (emission) sector, in the methods section when introducing the TAGGING submodel to avoid confusion about the two terms.

*The term category is used independently of the type of source, e.g. emission, decomposition process, or production in the stratosphere. In contrast, we use the term (emission) sector only for emissions. For example, the category land transport represents the contribution of the land transport emission sector, whereas the category stratosphere represents downward transport of O<sub>3</sub> formed in the stratosphere, which is not related to any emission sector.*

In section 2.3, on methane lifetime, the terminology used there might also be confusing to some readers - 'total' lifetime is often defined to include other loss processes, e.g. stratospheric loss, loss with Cl - so would it be better to define terms and specifying OH consistently and explicitly, e.g. L220 the term 'total lifetime',  $\tau_{CH_4, OH\_total}$ , would be better as 'total OH lifetime'. Similarly for L201  $\tau_{CH_4, sum}$  would appear to be  $\tau_{CH_4, sum\_OH}$ .

You are right that this could be confusing. We revised Sect. 2.3. and the Appendix and hope that it is clear now that the CH4 lifetime with respect to total OH is meant.

Accordingly, we also changed the acronym names from  $\tau_{CH_4, sum}$  to  $\tau_{CH_4, OH\_sum}$ , from  $\tau_{CH_4, res}$  to  $\tau_{CH_4, OH\_res}$ , and from  $\Delta\tau_{CH_4, i}$  to  $\Delta\tau_{CH_4, OH\_i}$ .

Section 3 presents the results. §3.1 highlights the change in the tropospheric ozone column between the two experiments. It would be interesting to know whether these changes bring the model into better or worse agreement with observational data on tropospheric ozone columns, if available.

Unfortunately, the update of the emission inventory from CCMI-1 to CCMI-2022 does not bring the model results into a better agreement with observed tropospheric ozone columns. The tropospheric ozone bias (and the corresponding underestimated tropospheric methane lifetime) become even larger (shorter). We refer to Jöckel et al. (2016) for a detailed analysis (CCMI-1)

and point out that this tropospheric ozone / methane lifetime bias is a common problem of many models (see also Prather and Zhu, 2024).

We added to the discussion section of the revised manuscript:

*As we show in the results section, the updated prescribed emission inventory leads to an increase of the tropospheric O<sub>3</sub> column by about 4%. As tropospheric O<sub>3</sub> is generally overestimated by the EMAC model (Jöckel et al., 2016), the use of the CCMI-2022 emission inventory for O<sub>3</sub> precursor species brings model's tropospheric O<sub>3</sub> further away from observations. Similarly, the tropospheric CH<sub>4</sub> lifetime is generally underestimated by EMAC compared to observations (Jöckel et al., 2016), which means that the use of the CCMI-2022 emission inventory leads to a less good agreement with observations. This is a common issue of many models (see also Prather and Zhu, 2024).*

Consistent use of the labels from Table 2 and in this section would help ('N2O' category vs 'N2O decomposition' category).  
Corrected.

The discussion of the drivers of the ozone column changes would be improved by diagnosing the response of O3P and O3L budget terms, if available for these tagged experiments. Including a calculation of ozone production efficiency would allow comparisons with other studies.

We added a figure showing zonal mean effective production and loss of O<sub>3</sub> in the supplement and describe the differences between the two simulations in the main manuscript shortly.

Indeed, we initially calculated the ozone production efficiency (OPE), but we decided at the end to not show and discuss it in the present study. We took this decision is for several reasons: First, OPE is rather a qualitative metric only and sometimes difficult to interpret. Second, the analyses we performed were not very conclusive, the regional distribution of OPE did hardly change between the different simulations, most probably since the spatial (horizontal) distributions of emissions between the CCMI-1 and CCMI-2022 inventories are very similar, but only the magnitudes of emission fluxes are different. And third, we want to keep the focus of your manuscript on the attribution of methane lifetime to different emission sectors.

Additionally, supplementary plots of zonal mean emission changes (latitude vs altitude) could help explore how emission changes impact ozone distribution.

We think that such altitude-latitude plots are not really meaningful, since most sectors are emitted in the lowermost layers/close to the surface, except for aviation, which shows a very similar methane lifetime contribution between CCMI-1 and CCMI-2022 (see Figure 7 in the manuscript), and lightning NO<sub>x</sub>, which does not change between the simulations.

3.2 discusses OH and shows the absolute-scale change in OH mole fraction (mol per mol) between the two experiments. The differences are plotted in terms of the changes in OH attributed to each of the tagging categories, with differences shown between EMIS-01 and 02. §3.2.2 discusses the methane lifetime. Figures 5 and 6 could be improved by plotting the CH<sub>4</sub>+OH-weighted OH, as discussed in Lawrence et al. (2001, [<https://doi.org/10.5194/acp-1-37-2001>])(<https://doi.org/10.5194/acp-1-37-2001>)).

37-2001)), to better understand the drivers of methane lifetime changes.

We added a plot showing the global and hemispheric mean tropospheric CH<sub>4</sub>+OH-weighted OH concentration of individual tagging categories as also suggested by referee 1 to the revised manuscript. We also added a plot showing the zonal mean CH<sub>4</sub>+OH-weighted total OH of both simulations and their difference (analogously to Figure 5) to the supplement. Figure 6 shows the zonal mean contribution of each tagged OH relative to total OH (in %). We don't think that it adds any value to plot the contribution on the basis on the CH<sub>4</sub>+OH-weighted total OH instead of the OH mixing ratio as the contribution is given relative to the total OH so that the results would be the same regardless of calculating the contribution on the basis of weighted OH concentration or OH mixing ratios.

3.3 serves as a synthesis section. Breaking this section into subsections—such as "What categories are generally important?" and "How does the importance of these categories change and why?"—would improve focus. Here the discussion becomes somewhat confusing in places, not least because, in the two experiments, some 'categories' involve a change in emissions and consequent change in chemistry, where the authors are easily able to connect the change in emissions to the observed change in ozone column, while in other places the tagging analysis is about processes only, e.g. lightning that has changed between the two experiments, and produced a change in O<sub>3</sub>. In the latter case, this could be described more fully to explain its impact on O<sub>3</sub> columns or methane lifetime.

As mentioned in the comment above, we added a figure showing the global and hemispheric mean tropospheric CH<sub>4</sub>+OH-weighted OH concentration of individual tagging categories. Using this figure we give some more information on which tagging categories are generally important for the methane loss with OH. For example the figure shows that lightning NO<sub>x</sub> emissions are the largest individual contributor to tropospheric methane loss with OH. But we want to stress again that online calculated emissions, e.g. lightning NO<sub>x</sub> emissions, are the same in both simulations, EMIS-01 and EMIS-02 (This is ensured by the use of the QCTM mode, see Methods section). There are differences in lightning NO<sub>x</sub> emissions between the simulations originally performed for CCMI-1 and CCMI-2022 (see supplement), but these do not influence the simulations analysed in this paper. Therefore, the methane lifetime change attributed to changing lightning NO<sub>x</sub> emissions as shown in Figure 8 (of the preprint) is small for the category lightning NO<sub>x</sub>.

We revised Sect. 3.2. and 3.3. to clarify the difference between categories that are generally important for methane loss, and categories that contribute to the methane lifetime difference between the two simulations.

However, in the synthesis in Sect. 3.3. we want to focus on identifying the categories that contribute to the ozone and methane lifetime differences between the two simulations, and on comparing these to the emission changes in the respective categories. We added a sentence to the revised manuscript in Sect. 3.3. to avoid misunderstanding.

The discussion section 4 on limitations and comparison with previous results could be folded into the discussion if the authors choose.

130 We are not quite sure what is suggested here. The discussion consists of the two mentioned sections. Therefore, we prefer to keep the structure as is.

Conclusions are nicely written and add a lot of value.

Thank you very much for this very motivating feedback!

## 135 1 Specific comments

– Figure 1: REFD1 should be capitalized in the caption. Additionally, I could not find a reference to Figure 1 in the text. The simulation names in the legend have been adapted. We reference Figure 1 in line 66, 71 and 73 (of the preprint).

– Figure 3 The labels of the RH colorbars are smaller than neighboring labels, making them difficult to read. The bottom-right panel appears incomplete. Corrected.

140 – Figure 6: The font size on the difference plot colorbar is inconsistent with neighboring labels. Corrected.

– L105 could the authors add an explanation for their choice of labels (rather than keeping the CCMI-1 and CCMI-2022)?

The simulations are named differently than CCMI-1 and CMI-2022 because we are analysing simulations that we have performed specifically for this publication, which differ from the simulations that have been originally performed for CCMI-1 and CCMI-2022. The model version that we are using for both, EMIS-01 and EMIS-02, is very similar to the one used for the original simulations performed for CCMI-2022. But this means that, in particular, EMIS-01 does not reproduce the simulations originally performed for CCMI-1 (see Figure 1). We added a short statement in the methods section to explain the naming:

145

*The simulation set-up is similar to the set-up of the CCMI-2022 REFD1SD simulation (hindcast with specified dynamics), but we deviate from the CCMI naming convention to clarify that we have performed the simulations specifically for this publication, and that they are not identical to the simulations originally performed for CCMI-1 and CCMI-2022.*

150

– L107 Clarify whether EMAC uses methane emissions or a boundary condition. If it's the latter, consistent terminology (e.g., "lower boundary") should be used for both  $\text{N}_2\text{O}$  and  $\text{CH}_4$  in §2.2. EMAC uses a prescribed lower boundary condition for  $\text{CH}_4$ . "Lower boundary" mixing ratios is now used consistently to describe  $\text{CH}_4$  and  $\text{N}_2\text{O}$ .

– L112 Reword 'The influence of the changed prescribed' to 'the influence of the change in the prescribed ODS'? Done.

155 – Table 2 caption needs consistent use of 'non-traffic' Changed to "non-traffic".

– L220 does 'in dependence' mean the dependence of  $\Delta\tau_{\text{CH}_4, \text{OH}_i}$  on  $\Delta\tau_{\text{CH}_4, \text{OH}_i}$ ? No, here "the dependence of  $\tau_{\text{CH}_4, \text{OH}_{\text{total}}}$  on  $\tau_{\text{CH}_4, \text{OH}_i}$ ", and not on  $\Delta\tau_{\text{CH}_4, \text{OH}_i}$  is meant. The sentence describes the first step of the derivation, which is explained in more detail in Appendix A. We reformulated the paragraph and point now to the corresponding equations in the Appendix to make it easier to understand.

- 160
- L254-L264 Reword "However, only for land..." to "The TRA and IND..." We rephrased to "However, for land transport and anthropogenic non-traffic emissions ..." as we are not using the acronyms TRA and IND anywhere else in the text.
  - L307 Sentences like "The shipping category also shows..." would benefit from discussing process-level changes (e.g., "In CCMI-1, the tagged OH from X category is larger than in CCMI-2022..."). We made some minor changes to the corresponding paragraph to facilitate readability.
- 165
- L336 categories occurs twice in the same sentence Removed at the second occurrence.
  - L397 show the increase, rather than show that the increase? We think that the previous formulation is correct as "that the increase ... is steeper ..." is a subordinate clause.
  - L413 EMIS-01 is repeated Corrected.
  - L428 Use "sector" for aviation and biomass burning. We are using sector now for aviation, but we could not find the
- 170
- expression "biomass burning category" in this paragraph.
  - L436 biomass burning sector Done.
  - L440 Replace "present day" with "recent historical." Done.
  - L447 Regional tagging would be a valuable addition, enabling closer examination of regional responses. We have added the sentence as suggested.

- Grewe, V., Tsati, E., Mertens, M., Fromming, C., and Jockel, P.: Contribution of emissions to concentrations: the TAGGING 1.0 submodel based on the Modular Earth Submodel System (MESSy 2.52), *Geoscientific Model Development*, 10, 2615–2633, <https://doi.org/10.5194/gmd-10-2615-2017>, 2017.
- Jöckel, P., Tost, H., Pozzer, A., Kunze, M., Kirner, O., Brenninkmeijer, C. A. M., Brinkop, S., Cai, D. S., Dyroff, C., Eckstein, J., Frank, F.,  
180 Garny, H., Gottschaldt, K. D., Graf, P., Grewe, V., Kerkweg, A., Kern, B., Matthes, S., Mertens, M., Meul, S., Neumaier, M., Nutz, M., Oberländer-Hayn, S., Ruhnke, R., Runde, T., Sander, R., Scharffe, D., and Zahn, A.: Earth System Chemistry integrated Modelling (ESCiMo) with the Modular Earth Submodel System (MESSy) version 2.51, *Geoscientific Model Development*, 9, 1153–1200, <https://doi.org/10.5194/gmd-9-1153-2016>, 2016.
- Prather, M. J. and Zhu, L.: Resetting tropospheric OH and CH<sub>4</sub> lifetime with ultraviolet H<sub>2</sub>O absorption, *Science*,  
185 385, 201–204, <https://doi.org/10.1126/science.adn0415>, 2024.
- Rieger, V. S., Mertens, M., and Grewe, V.: An advanced method of contributing emissions to short-lived chemical species (OH and HO<sub>2</sub>): the TAGGING 1.1 submodel based on the Modular Earth Submodel System (MESSy 2.53), *Geoscientific Model Development*, 11, 2049–2066, <https://doi.org/10.5194/gmd-11-2049-2018>, 2018.
